# Supplementary material for: Comparative Phylogeography of a Coevolved Community: Concerted Population Expansions in Joshua Trees and Four Yucca Moths
Source: PLOS journal article supplement (doi:10.1371/journal.pone.0025628), 2011-10-18
Supplement: S6 (10.1371/journal.pone.0025628.s006) [file journal.pone.0025628.s006]

**Table S4: Worldclim Variables Included In Estimation of Paleodistributions**

| <b>Name</b> | <b>Climate Variable</b>                              |
|-------------|------------------------------------------------------|
| BIO1        | Annual Mean Temperature                              |
| BIO4        | Temperature Seasonality (standard deviation *100)    |
| BIO8        | Mean Temperature of Wettest Quarter                  |
| BIO9        | Mean Temperature of Driest Quarter                   |
| BIO10       | Mean Temperature of Warmest Quarter                  |
| BIO11       | Mean Temperature of Coldest Quarter                  |
| BIO12       | Annual Precipitation                                 |
| BIO13       | Precipitation of Wettest Month                       |
| BIO14       | Precipitation of Driest Month                        |
| BIO15       | Precipitation Seasonality (Coefficient of Variation) |
| BIO16       | Precipitation of Wettest Quarter                     |
| BIO17       | Precipitation of Driest Quarter                      |
| BIO18       | Precipitation of Warmest Quarter                     |
| BIO19       | Precipitation of Coldest Quarter                     |
